# Supplementary material
Source: Elsevier journal article supplement (https://www.sciencedirect.com/science/article/pii/S2603647919300818)
Supplement: mmc1 [file S2603647919300818:mmc1.docx]

**ANEXO 1: Términos consensuados tras traducción-retrotraducción, junto con “equivalentes” en castellano**

| INGLÉS | CATALÀ | CASTELLANO |
| --- | --- | --- |
| Medical Office | Centre d’Atenció Primària | Centro de Salud |
| Provider | Personal sanitari | Personal sanitario |
| Critical abnormal result | Resultat patològic greu | Resultado crítico anormal |
| Staff | Personal no sanitari | Personal no sanitario |
| Issues | Aspectes relacionats amb la seguretat/ Qüestions sobre seguretat | Aspectos relacionados con la Seguridad/ Cuestiones sobre seguridad |
| Care / Quality of care | Assistència o atenció / Qualitat de l’assistència o atenció | Asistencia o Atención / Calidad de la asistencia o de la atención |
| Medical equipment | Equipament sanitari | Equipamiento médico |
| acute/serious problem | Problema de salut agut | Problema de salud agudo |
| Follow up | Fer seguiment/ Prendre mesures | Supervisar |
| Processes | Processos | Procedimientos |
| Outside provider | Professional extern | Especialista de otro centro |
| Handle our patient load | Gestionar la demanda dels usuaris | Manejar la carga de Trabajo de los pacientes |
| Critical abnormal result | Resultat patològic greu | Resultado crítico anormal |
| Physician Assistant, Nurse Practitioner, Clinical Nurse Specialist, Nurse Midwife, Advanced Practice Nurse, etc. | Metge de família, Pediatra, Metge intern resident, Odontòleg, Ginecòleg, Infermer/a, Auxiliar d’infermeria, Auxiliar administratiu, Administratiu,  Zelador, Treballador social,  Fisioterapeuta, Equip directiu, Altres. Si us plau especifiqueu. | Médico/MIR, Enfermera/enfermera especialista, Gestores: Coordinador médico,  Responsable del área administrativa, Responsable de enfermería, Otros gestores del centro, Administrativos y otro personal no sanitario, Otros profesionales asistenciales en el centro de salud: Auxiliar de clínica, Técnicos (de todos los tipos), Fisioterapeuta (de todos los tipos), Otros profesionales |

**ANEXO 2: Aportaciones de los profesionales en la fase de Debriefing (Etapa 3)**

Percepción general de la importancia del tema que trata el cuestionario: muy interesante.

- Tiempo necesario para completar el cuestionario: han invertido una media de 20 minutos, 5 minutos más de la estimación que hace la guía del cuestionario original inglés.

- Encuentran el cuestionario muy largo, con excesivas preguntas.

- eliminar algunas preguntas que exploran el mismo concepto y resultan repetitivas.

- Las opciones para la respuesta son excesivas.

- El personal no sanitario no se siente capacitado para contestar las cuestiones referentes a los profesionales sanitarios, sobre todo las incluidas en la sección A y B.

Los profesionales sanitarios también expresan dificultades para dar su opinión en temas relacionados con las tareas que realiza el personal no sanitario.

- Hay algunas preguntas referentes exclusivamente al personal no sanitario que piensan que deberían explorarse también entre los sanitarios: sección C, sobre formación recibida por el puesto de trabajo y seguimiento de procesos estandarizados principalmente y sección D, sobre comunicación de los errores.

- En la sección E: la aclaración que se hace para contestar esta sección o no, puede llevar a errores de interpretación, por lo que algunas personas interpretan que tienen que contestar sólo las preguntas de 1 a 4 de la sección C y dejan de contestar la sección F.

- En general, la valoración global que hacen es que el cuestionario resulta muy interesante por el tema que estudia, es fácil de leer y entender al contener preguntas muy cortas y concretas, pero es excesivamente largo y el tiempo necesario para responder también es demasiado grande.

**QÜESTIONARI SOBRE SEGURETAT DEL PACIENT AL CENTRE D’ATENCIÓ PRIMARIA**

**INSTRUCIONS PER LA CUMPLIMENTACIÓ DEL QÜESTIONARI**

Penseu en la manera com es fan les coses en el vostre Centre d’Atenció Primària (CAP) i doneu la vostra opinió sobre els temes que afecten la seguretat i la qualitat de l’assistència que doneu als pacients.

En aquest qüestionari el terme **personal sanitari** fa referència als metges, infermeres, auxiliars d’infermeria i altres professionals de l’àmbit de la salut. El terme **personal no sanitari**, fa referència a la resta de treballadors del Centre.

- Si alguna pregunta no afecta la vostra feina o no en sabeu la resposta, assenyaleu “ no procedeix o no ho sé”.
- Si treballeu en més d’un Centre, contesteu pensant nomes en el Centre que us ha facilitat aquesta enquesta.
- Si el vostre CAP comparteix edifici amb un altre CAP, contesteu només pensant sobre el CAP on treballeu.

**SECCIÓ A: llistat d’aspectes relacionats amb la seguretat del pacient i la Qualitat.**

Els punts següents descriuen situacions que poden donar-se als CAP i que afecten la seguretat del pacient i la qualitat de l’assistència.

| **Aproximadament, amb quina freqüència s’han donat aquestes situacions al vostre CAP EN ELS DARRERS 12 MESOS?** | **Cada dia** | **Cada setmana** | **Cada mes** | **Més de 2 vegades en els últims 12 mesos** | **1 o 2 vegades en els últims 12 mesos** | **Cap vegada en els últims 12 mesos** | **No procedeix o no sé** |
| --- | --- | --- | --- | --- | --- | --- | --- |
| **Accés a l’assistència** |  |  |  |  |  |  |  |
| 1.- Un pacient amb un problema de salut agut, no va poder concertar una cita en 48 hores. |  |  |  |  |  |  |  |
| **Identificació del pacient** |  |  |  |  |  |  |  |
| 2.- Es va utilitzar una història clínica equivocada. |  |  |  |  |  |  |  |
| **Històries Clíniques** |  |  |  |  |  |  |  |
| 3.- No es va tenir accés a la Història Clínica d’un pacient quan es va necessitar. |  |  |  |  |  |  |  |
| 4.- La informació mèdica estava arxivada, escanejada o guardada en l’historial d’un altre pacient. |  |  |  |  |  |  |  |
| **Equipament sanitari** |  |  |  |  |  |  |  |
| 5.- L’equipament sanitari no funcionava adequadament, calia reparar-lo o substituir-lo. |  |  |  |  |  |  |  |
| **Medicació** |  |  |  |  |  |  |  |
| 6.- Una farmàcia s’ha posat en contacte amb vosaltres per aclarir un dubte sobre una prescripció o corregir-la. |  |  |  |  |  |  |  |
| 7.- No es va revisar i actualitzar el tractament d’un pacient durant la visita. |  |  |  |  |  |  |  |
| **Diagnòstics i proves** |  |  |  |  |  |  |  |
| 8.- Els resultats d’una prova de laboratori o d’imatge no estaven disponibles quan es van necessitar. |  |  |  |  |  |  |  |
| **Aproximadament, amb quina freqüència s’han donat aquestes situacions al vostre CAP EN ELS DARRERS 12 MESOS?** | **Cada dia** | **Cada setmana** | **Cada mes** | **Més de 2 vegades en els últims 12 mesos** | **1 o 2 vegades en els últims 12 mesos** | **Cap vegada en els últims 12 mesos** | **No procedeix o no sé** |
| 9.- No es va prendre cap mesura en el mateix dia davant un resultat patològic greu d’una prova de laboratori o d’imatge |  |  |  |  |  |  |  |

**SECCIÓ B: Intercanvi d’informació amb altres nivells assistencials.**

| **En els darrers 12 mesos, amb quina freqüència heu tingut problemes en l’intercanvi d’informació acurada, completa i puntual amb:** | **Cada dia** | **Cada setmana** | **Cada mes** | **Més de 2 vegades en els últims 12 mesos** | **1 o 2 vegades en els últims 12 mesos** | **Cap vegada en els últims 12 mesos** | **No procedeix o no sé** |
| --- | --- | --- | --- | --- | --- | --- | --- |
| 1.- Laboratoris i serveis de diagnòstic per la imatge externs. |  |  |  |  |  |  |  |
| 2.- Professionals d’altres CAPs o metges de altres especialitats. |  |  |  |  |  |  |  |
| 3.- Farmàcies. |  |  |  |  |  |  |  |
| 4.- Hospital. |  |  |  |  |  |  |  |
| 5.- Altres (especifiqueu) |  | | | | | | |

**SECCIÓ C: Treballant en el vostre Centre d’Atenció Primària**

| **Fins a quin punt esteu d’acord o en desacord amb les següents afirmacions?** | **Completament en desacord** | **En desacord** | **Ni d’acord ni en desacord** | **D’acord** | **Completament d’acord** | **No procedeix o no ho se** |
| --- | --- | --- | --- | --- | --- | --- |
| 1.- Quan algun professional té un excés de treball, els altres companys l’ajuden. |  |  |  |  |  |  |
| 2.- La relació entre els professionals sanitaris i no sanitaris és bona. |  |  |  |  |  |  |
| 3.- Sovint sentim que no tenim prou temps per atendre els nostres pacients. |  |  |  |  |  |  |
| 4.- El Centre proporciona formació al personal no sanitari quan s’implementen nous procediments |  |  |  |  |  |  |
| 5.- En aquest Centre hi ha un tracte de respecte entre els professionals. |  |  |  |  |  |  |
| 6.- Tenim massa pacients en relació al nombre de professionals que hi treballa. |  |  |  |  |  |  |
| 7.- El Centre s’assegura que el personal no sanitari rep la formació que necessita pel seu lloc de treball. |  |  |  |  |  |  |
| 8.- El Centre està més desorganitzat del que hauria d’estar. |  |  |  |  |  |  |
| 9.- El Centre disposa de procediments adequats per comprovar que la feina es fa correctament. |  |  |  |  |  |  |
| 10.- Al personal no sanitari se’ls encomanen tasques per les que no han estat formats. |  |  |  |  |  |  |
| 11.- El Centre disposa de suficient personal no sanitari per gestionar la demanda dels usuaris. |  |  |  |  |  |  |
| 12.- El Centre té dificultats per la gestió de les càrregues de treball. |  |  |  |  |  |  |
| **Fins a quin punt esteu d’acord o en desacord amb les següents afirmacions?** | **Completament en desacord** | **En desacord** | **Ni d’acord ni en desacord** | **D’acord** | **Completament d’acord** | **No procedeix o no ho se** |
| 13.- El Centre dóna molta importància al treball en equip a l’hora d’atendre al pacient. |  |  |  |  |  |  |
| 14.- el Centre té massa pacients per poder-los atendre de manera efectiva. |  |  |  |  |  |  |
| 15.- El personal no sanitari segueix processos estandarditzats per dur a terme les seves tasques. |  |  |  |  |  |  |
| 16.- El Centre proporciona formació al personal sanitari quan s’implementen nous procediments. |  |  |  |  |  |  |
| 17.- El Centre s’assegura que el personal sanitari rep la formació que necessita pel seu lloc de treball. |  |  |  |  |  |  |
| 18.- Al personal sanitari se’ls encomanen tasques per les que no ha estat format. |  |  |  |  |  |  |
| 19.- El personal sanitari segueix processos estandarditzats per dur a terme les seves tasques. |  |  |  |  |  |  |

**SECCIÓ D: COMUNICACIÓ I SEGUIMENT**

| **Amb quina freqüència s’han donat les següents situacions en el vostre CAP?** | **Mai** | **Quasi mai** | **De vegades** | **Quasi sempre** | **Sempre** | **No procedeix o no ho se** |
| --- | --- | --- | --- | --- | --- | --- |
| 1.- El personal sanitari es receptiu a les idees del personal no sanitari sobre la millora dels processos . |  |  |  |  |  |  |
| 2.- El Centre anima el personal no sanitari a expressar punts de vista diferents.. |  |  |  |  |  |  |
| 3.- El Centre recorda als pacients quan han de demanar una visita preventiva o de control. |  |  |  |  |  |  |
| 4.- El personal té por de preguntar quan una cosa no els sembla correcte. |  |  |  |  |  |  |
| 5.- El Centre registra el compliment del tractament farmacològic dels pacients crònics. |  |  |  |  |  |  |
| 6.- El Centre fa un seguiment actiu d’un informe no rebut d’un professional extern. |  |  |  |  |  |  |
| 7.- El personal no sanitari sent que se li retreuen els seus errors. |  |  |  |  |  |  |
| 8.- El personal sanitari i no sanitari parla obertament sobre els problemes del Centre. |  |  |  |  |  |  |
| 9.- El Centre fa seguiment dels pacients que necessiten controls periòdics. |  |  |  |  |  |  |
| 10.- En aquest Centre és difícil verbalitzar el desacord. |  |  |  |  |  |  |
| 11.- En aquest Centre es discuteixen estratègies per evitar la repetició dels errors. |  |  |  |  |  |  |
| 12.- El personal no sanitari està disposat a informar dels errors que observen en el Centre. |  |  |  |  |  |  |
| **Amb quina freqüència s’han donat les següents situacions en el vostre CAP?** | **Mai** | **Quasi mai** | **De vegades** | **Quasi sempre** | **Sempre** | **No procedeix o no ho se** |
| 13.- El personal sanitari sent que se li retreuen els seus errors. |  |  |  |  |  |  |
| 14.- El personal sanitari està disposat a informar dels errors que observen en el Centre. |  |  |  |  |  |  |

**SECCIÓ E: Suport de la gerència o de l’equip directiu**

1. Teniu un càrrec directiu que us permet prendre decisions financeres al vostre Centre? - Si: aneu a la secció F

- No: continueu contestant el qüestionari.

| **Fins a quin punt esteu d’acord amb les següents afirmacions referents a la direcció del vostre Centre?** | **Completament en desacord** | **En desacord** | **Ni d’acord ni en desacord** | **D’acord** | **Completa-ment d’acord** | **No procedeix o no ho se** |
| --- | --- | --- | --- | --- | --- | --- |
| 1.- La direcció del Centre no dedica prou recursos per millorar la qualitat de l’assistència. |  |  |  |  |  |  |
| 2.- La direcció del Centre ignora els errors assistencials al pacients que es produeixen reiteradament. |  |  |  |  |  |  |
| 3.- La direcció del Centre prioritza la millora dels processos assistencials. |  |  |  |  |  |  |
| 4.- Massa sovint prenen decisions més basades en el que és millor pel Centre que no pas pels pacients. |  |  |  |  |  |  |

**SECCIÓ F: Al vostre CAP**

| **Fins a quin punt esteu d’acord o en desacord amb les següents afirmacions.** | **Completament en desacord** | **En desacord** | **Ni d’acord ni en desacord** | **D’acord** | **Completa-ment d’acord** | **No procedeix o no ho se** |
| --- | --- | --- | --- | --- | --- | --- |
| 1.- Quan hi ha un problema al nostre Centre, valorem la necessitat de canviar com fem les coses. |  |  |  |  |  |  |
| 2.- El nostre Centre disposa de processos per prevenir errades que poden afectar els pacients. |  |  |  |  |  |  |
| 3.- En aquest Centre es produeixen més errades de les acceptables. |  |  |  |  |  |  |
| 4.- Només l’atzar impedeix que es cometin més errades amb els pacients. |  |  |  |  |  |  |
| 5.- El Centre és capaç de modificar els processos perquè no es repeteixin els mateixos errors. |  |  |  |  |  |  |
| 6.- Aquest CAP prioritza la quantitat de feina feta per sobre de la qualitat assistencial. . |  |  |  |  |  |  |
| 7.- Un cop introduïts canvis per millorar l’assistència als pacients, es comprova si són efectius. |  |  |  |  |  |  |

**SECCIÓ G: VALORACIÓ GLOBAL**

**Valoració global sobre la Qualitat**

| **1.En general, com valoraríeu el vostre CAP en les següents àrees de qualitat assistencial?** | **Malament** | **Acceptable** | **Bé** | **Molt bé** | **Excel·lent** |
| --- | --- | --- | --- | --- | --- |
| 1. **Centrat en el pacient**: es té en compte les preferències, necessitats i valors del pacient. |  |  |  |  |  |
| 1. **Eficaç**: es basa en l’evidència científica. |  |  |  |  |  |
| 1. **Temps**: Minimitza els retards que puguin comportar riscos pel pacient. |  |  |  |  |  |
| 1. **Eficient: :** Assegura una assistència cost- eficaç (evitant el malbaratament, l’abús, i el mal ús dels recursos) |  |  |  |  |  |
| 1. **Equitatiu:** Ofereix la mateixa qualitat assistencial a tots els pacients independentment del seu gènere, raça, ètnia, nivell socioeconòmic, llengua, etc. |  |  |  |  |  |

**Valoració global sobre la Seguretat del Pacient**

|  | **Malament** | **Acceptable** | **Bé** | **Molt bé** | **Excel·lent** |
| --- | --- | --- | --- | --- | --- |
| **1. En general, com valoraríeu els sistemes i processos clínics que el vostre Centre disposa per prevenir, detectar i corregir problemes que poden afectar els pacients?** |  |  |  |  |  |

**SECCIÓ H: dades socio-demogràfiques**

**1.- Quant de temps fa que treballeu en aquest Centre?**

**a**: menys de 2 mesos  **d**: entre 3 -6 anys

**b**: entre 2 mesos - 1 any  **e**: entre 6 -11 anys

**c**: entre 1- 3 anys  **f** :11 o més anys

**2.- Normalment, quantes hores a la setmana treballeu en aquest Centre?**

**a**: entre 1- 4 hores/setmana  **d**: entre 25 -32 hores/setmana

**b**: entre 5 -16 hores/setmana  **e**: entre 33 -40 hores/setmana

**c**: entre 17 -24 hores/setmana  **f**: 41 o més hores/setmana

**SECCIÓ H: dades professionals**

**3.- Quina és la vostra categoria professional al Centre? Trieu la categoria més adient amb la vostra feina.**

a: Metge de família

b: Pediatra

c: Metge intern resident

d: Odontòleg

e: Ginecòleg

f: Infermer/a

g: Auxiliar d’infermeria

h: Auxiliar administratiu

i: Administratiu

j: Zelador

k: Treballador social

l: Fisioterapeuta

m: Equip directiu

n: Altres. Si us plau especifiqueu.

**SECCIÓ I: comentaris**

**Escriviu aquí qualsevol comentari que desitgeu afegir sobre la seguretat del pacient o la qualitat assistencial en el vostre CAP**
